# Supplementary material for: Nanocasting synthesis of BiFeO3 nanoparticles with enhanced visible-light photocatalytic activity
Source: publisher site journal article supplement (doi:10.3762/bjnano.11.164), 2020-12-07
Supplement: Additional file 1 [file 2190-4286-11-164-S1.pdf]

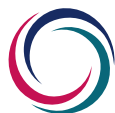

## Supporting Information

for

### **Nanocasting synthesis of BiFeO<sub>3</sub> nanoparticles with enhanced visible-light photocatalytic activity**

Thomas Cadenbach, Maria J. Benitez, A. Lucia Morales, Cesar Costa Vera, Luis Lascano, Francisco Quiroz, Alexis Debut and Karla Vizuite

*Beilstein J. Nanotechnol.* **2020**, *11*, 1822–1833. doi:10.3762/bjnano.11.164

## Additional figures and tables

**Table S1:** Calcination paths.

| <b>Path</b>                       | <b>Reaction regarding:<br/>complexing agents, solvents,<br/>molar ratio-0</b> | <b>Reaction<br/>regarding<br/>molar ratio-1</b> |
|-----------------------------------|-------------------------------------------------------------------------------|-------------------------------------------------|
| <b>Initial temperature (°C)</b>   | 22                                                                            | -                                               |
| <b>Heat rate 1 (°C/min)</b>       | 1                                                                             | -                                               |
| <b>Plateau 1 (°C)</b>             | 200                                                                           | -                                               |
| <b>Drying Time 1 (h)</b>          | 2                                                                             | -                                               |
| <b>Heat rate 2 (°C/min)</b>       | 1                                                                             | -                                               |
| <b>Plateau 2 (°C)</b>             | 250                                                                           | -                                               |
| <b>Drying Time 2 (h)</b>          | 2                                                                             | -                                               |
| <b>Heat rate 3 (°C/min)</b>       | 4                                                                             | 4                                               |
| <b>Final Temperature (°C)</b>     | 500                                                                           | 500                                             |
| <b>Final Calcination Time (h)</b> | 1                                                                             | 1                                               |

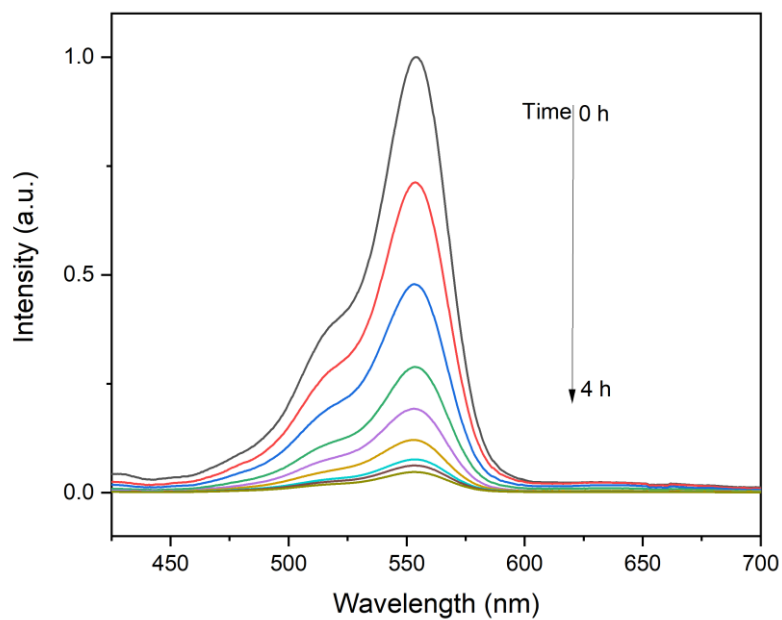

**Figure S1:** UV–vis spectra of Rhodamine B in dependence of irradiation time in the presence of 5.5 nm BiFeO<sub>3</sub> NP.

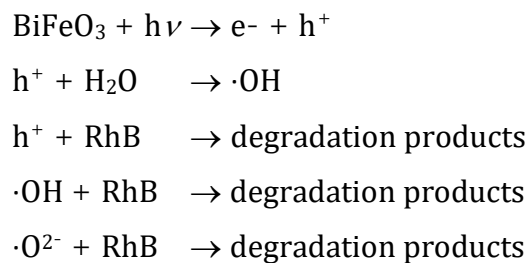

**Figure S2:** Photocatalytic mechanism of RhB degradation using 5.5 nm BiFeO<sub>3</sub> nanoparticles.

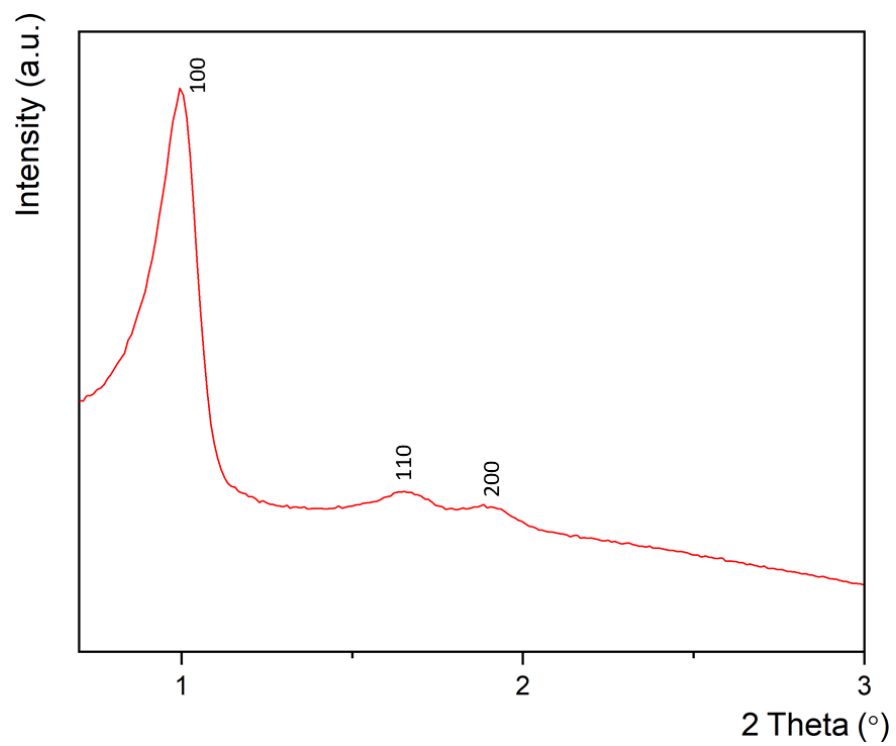

**Figure S3:** Small-angle XRD pattern of SBA-15.

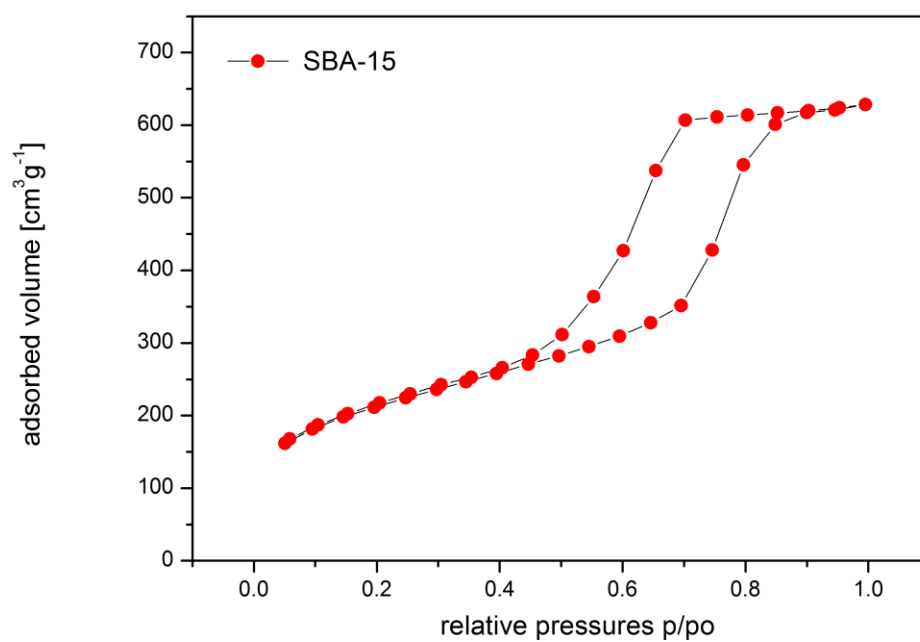

**Figure S4:** Nitrogen adsorption isotherms of SBA-15.

**Table S2:** Summary of BET analysis of SBA-15.

| <b>Pore Size</b>                                |            |
|-------------------------------------------------|------------|
|                                                 |            |
| Adsorption average pore diameter (4V/A by BET): | 6.01773 nm |
|                                                 |            |
| Desorption average pore diameter (4V/A by BET): | 6.05495 nm |
|                                                 |            |
| BJH Adsorption average pore diameter (4V/A):    | 6.2516 nm  |
|                                                 |            |
| BJH Desorption average pore diameter (4V/A):    | 5.8164 nm  |
|                                                 |            |
| D-H Adsorption average pore diameter (4V/A):    | 6.2643 nm  |
|                                                 |            |
| D-H Desorption average pore diameter (4V/A):    | 5.8198 nm  |

| <b>Surface Area</b>                                   |                              |
|-------------------------------------------------------|------------------------------|
|                                                       |                              |
| Single point surface area at $P/P_0 = 0,3000000000$ : | 680.2137 m <sup>2</sup> /g   |
|                                                       |                              |
| BET Surface Area:                                     | 699.0213 m <sup>2</sup> /g   |
|                                                       |                              |
| Langmuir Surface Area:                                | 3,573.7975 m <sup>2</sup> /g |
|                                                       |                              |
| t-Plot Micropore Area:                                | 33.0353 m <sup>2</sup> /g    |
|                                                       |                              |
| t-Plot external surface area:                         | 665.9860 m <sup>2</sup> /g   |
|                                                       |                              |
| BJH Adsorption cumulative surface area of pores       |                              |
| between 1.7000 nm and 300.0000 nm diameter:           | 651.433 m <sup>2</sup> /g    |
|                                                       |                              |

|                                                 |                            |
|-------------------------------------------------|----------------------------|
| BJH Desorption cumulative surface area of pores |                            |
| between 1.7000 nm and 300.0000 nm diameter:     | 716.5886 m <sup>2</sup> /g |
|                                                 |                            |
| D-H Adsorption cumulative surface area of pores |                            |
| between 1.7000 nm and 300.0000 nm diameter:     | 647.872 m <sup>2</sup> /g  |
|                                                 |                            |
| D-H Desorption cumulative surface area of pores |                            |
| between 1.7000 nm and 300.0000 nm diameter:     | 714.5655 m <sup>2</sup> /g |

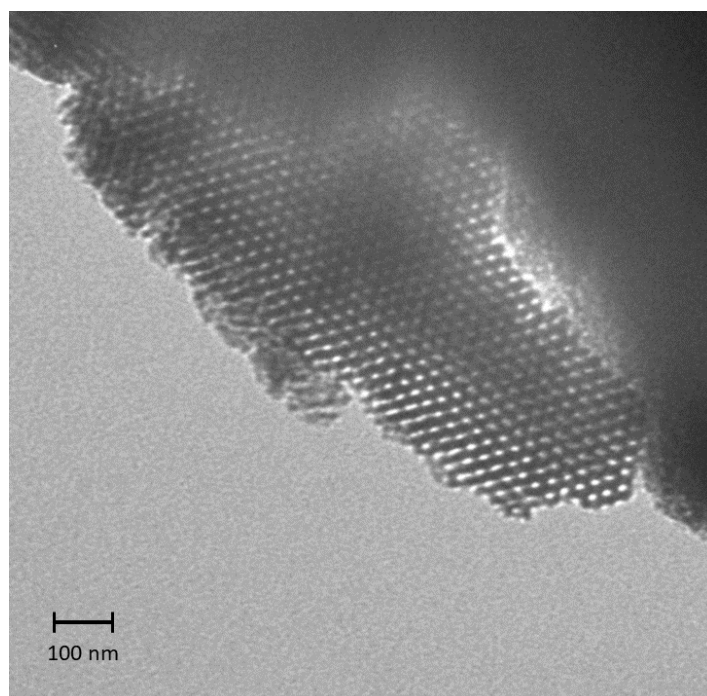

**Figure S5:** TEM image of SBA-15.

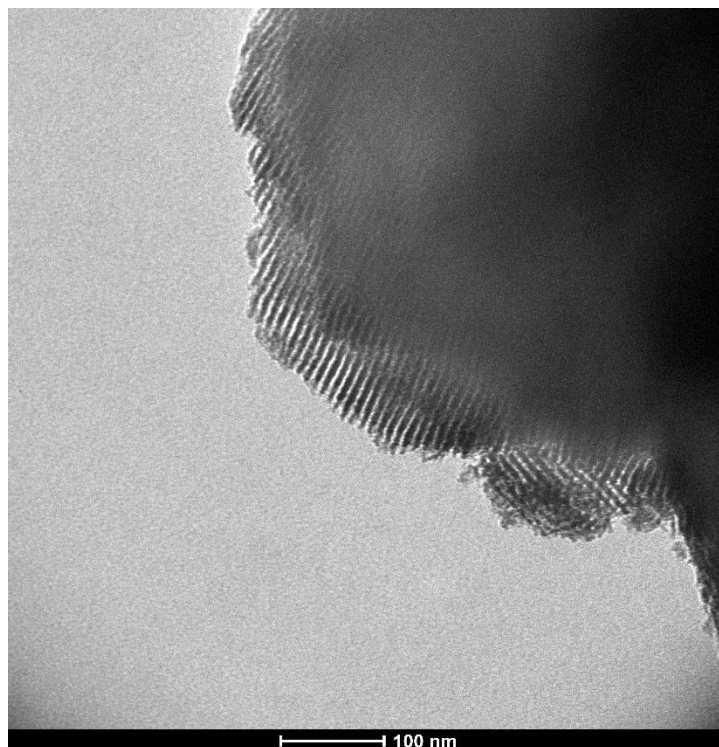

**Figure S6:** TEM image of BiFeO<sub>3</sub>@SBA-15.

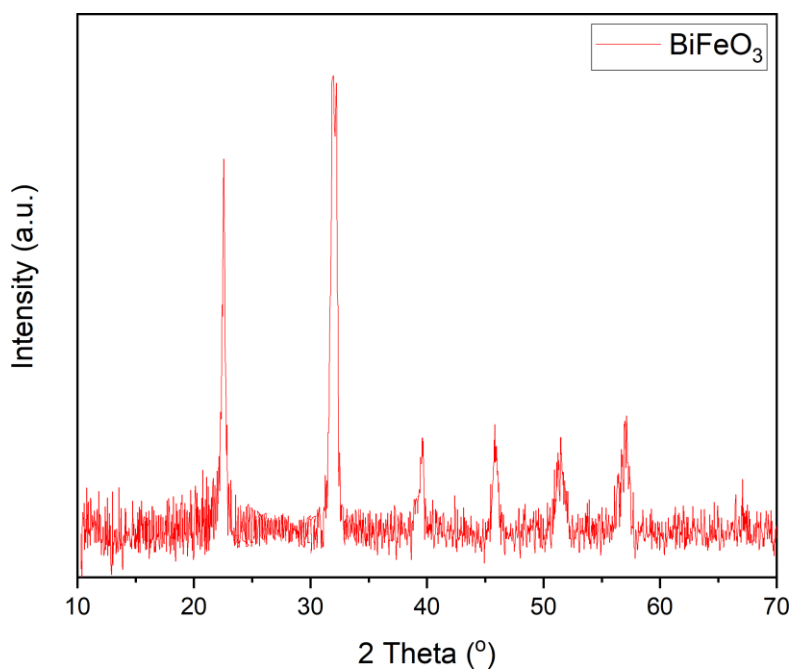

**Figure S7:** XRD pattern of 5.5 nm BiFeO<sub>3</sub> NP after 5 catalytic cycles.
